# Supplementary material
Source: PubMed Central journal article supplement (PMC3018235)
Supplement: NIHMS256864-supplement-01.pdf [file NIHMS256864-supplement-01.pdf]

## SUPPLEMENTAL DATA:

### Figure Legends:

**Supplemental Figure 1.** (A) Schematic representations of serial sections from the rostral (-0,80) to the caudal (-2,56) extension of the PVN, showing microinjection sites considered in or out of the PVN borders. Symbols are representative of injection sites for saline in Sham rats (clear squares), saline in IH-exposed rats, (gray circles), muscimol in IH-exposed rats (black triangles) and Ang antagonists out of PVN in IH-exposed rats (black X). (B) Schematic and stained brain section showing site of injection for representative sample. (C) Grouped data showing 24 hour average recordings of mean arterial pressure (MAP) and ( D) heart rate (HR, B) in IH and Sham treated rats, chronically infused with saline (200nL) or Ang antagonists (2 nmol/h) out of the PVN. Values are expressed as changes from baseline. \* $P < 0.05$  and \*\* $P < 0.01$  for IH Ang antagonists out of PVN vs. Sham saline; † $P < 0.05$  and †† $P < 0.01$  for IH saline vs. IH saline within PVN (*Two-way* ANOVA with post test Bonferroni). 3V indicates third ventricle; AHy, anterior hypothalamic nucleus; f, fornix.

**Supplemental Figure 2.** Grouped data showing 24 hour average recordings of mean arterial pressure (MAP) and heart rate (HR) in Sham exposed rats (A and B) and IH exposed rats (C and D) chronically infused with saline (200nL) muscimol (20 pmol/h), losartan (2 nml/h), or A-779 (2 nmol/h) into the PVN. Values are expressed as changes from baseline. \* $P < 0.05$  and \*\* $P < 0.01$  for drug vs saline; † $P < 0.05$  and †† $P < 0.01$  for IH vs. Sham saline; # $P < 0.05$  (*Two-way* ANOVA with post test Bonferroni).

**A** Sites within PVN

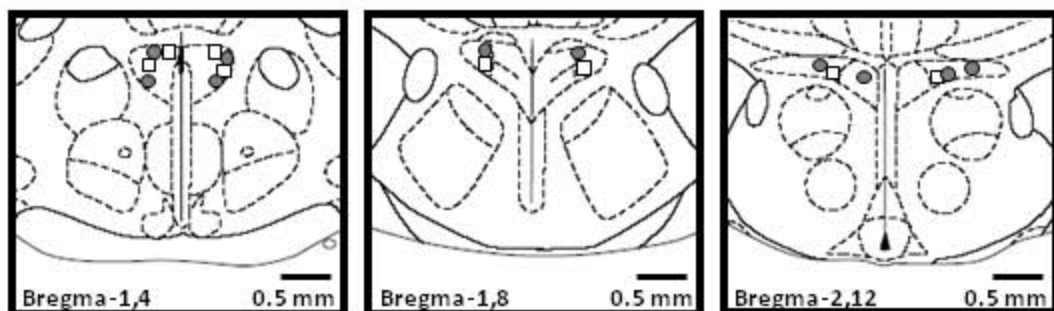

Sites out of PVN

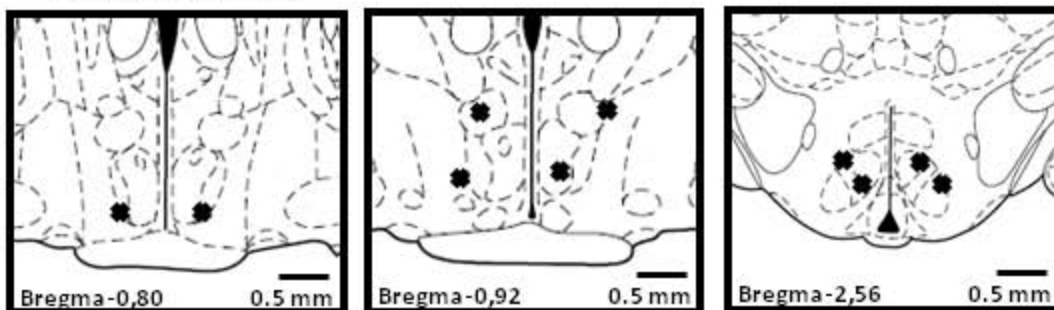

**B**

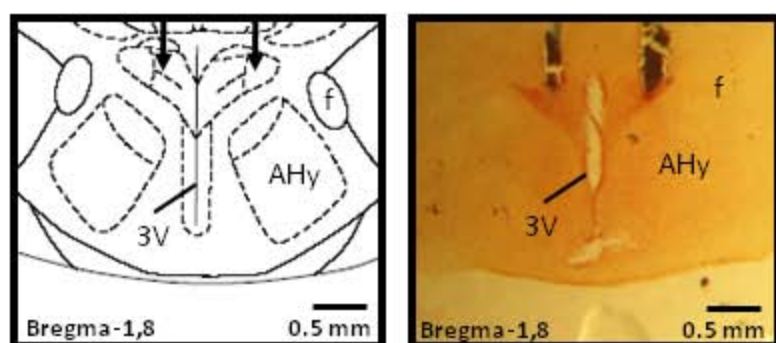

**C**

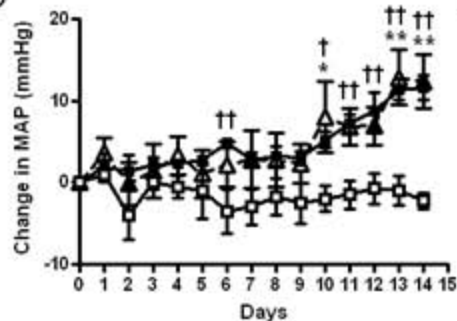

**D**

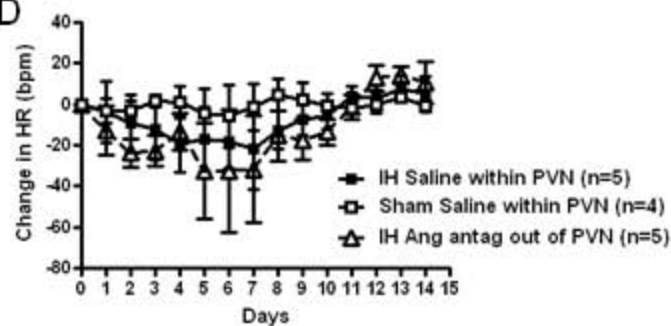

Supplemental Figure 1b

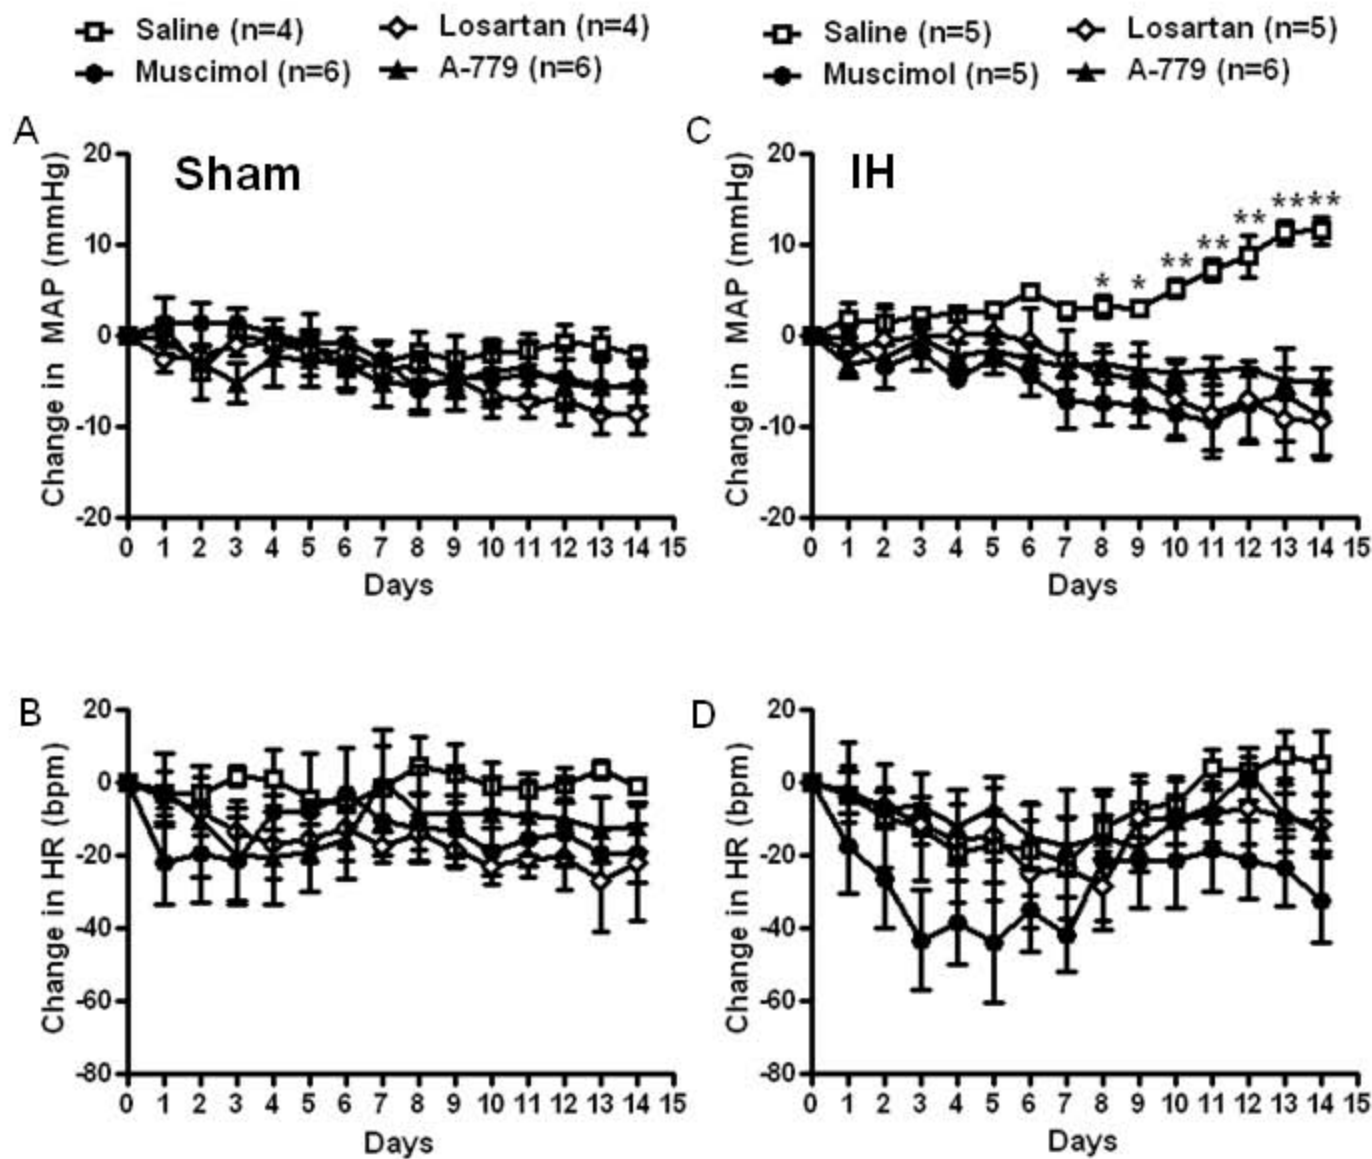

Supplemental Figure 2
